# Supplementary material for: Prediction of the development of acute kidney injury following cardiac surgery by machine learning
Source: Springer Nature journal article supplement (doi:10.1186/s13054-020-03179-9), 2020-07-31
Supplement: MOESM1 [file 18237760]

**Table 1.** Characteristics and perioperative variables of patients developed acute kidney injury or not after cardiac surgery

| Variables                              | All              | AKI              | No AKI           | p-Value |
|----------------------------------------|------------------|------------------|------------------|---------|
| <b>Patient population, n</b>           | 671              | 163              | 508              |         |
| <b>Demographic data</b>                |                  |                  |                  |         |
| Age (years)                            | 63 (53-70)       | 66 (59-73)       | 61 (51-69)       | 0.000*  |
| Male, n (%)                            | 454 (67.7)       | 121 (74.2)       | 333 (65.6)       | 0.039*  |
| BMI (kg/m <sup>2</sup> )               | 24.8 (22.5-27.8) | 25.2 (23.0-28.2) | 24.7 (22.4-27.3) | 0.187   |
| Allergy, n (%)                         | 598 (89.1)       | 18 (11.0)        | 55 (10.8)        | 0.939   |
| ABO, n (%)                             |                  |                  |                  |         |
| Type A                                 | 196 (29.2)       | 48 (29.4)        | 148 (29.1)       | 0.939   |
| Type B                                 | 144 (21.5)       | 31 (19.0)        | 113 (22.2)       | 0.383   |
| Type AB                                | 42 (6.3)         | 14 (8.6)         | 28 (5.5)         | 0.158   |
| Type O                                 | 289 (43.1)       | 70 (42.9)        | 219 (43.1)       | 0.970   |
| Smoking, n (%)                         | 244 (36.4)       | 75 (46.0)        | 169 (33.2)       | 0.003*  |
| <b>Surgery type</b>                    |                  |                  |                  |         |
| CABG only, n (%)                       | 250 (37.3)       | 51 (31.3)        | 199 (39.2)       | 0.070   |
| Valve surgery only, n (%)              | 347 (51.7)       | 76 (46.6)        | 271 (53.3)       | 0.135   |
| Combined CABG + Valve surgery, n (%)   | 74 (11.0)        | 36 (22.1)        | 38 (7.4)         | 0.000*  |
| Minimally invasive surgery, n (%)      | 336 (50.1)       | 59 (36.2)        | 277 (54.5)       | 0.000*  |
| <b>Preoperative condition</b>          |                  |                  |                  |         |
| ER stay >1 day, n (%)                  | 59 (8.8)         | 27 (16.6)        | 32 (6.3)         | 0.000*  |
| Previous cardiac surgery, n (%)        | 96 (14.3)        | 33 (20.2)        | 63 (12.4)        | 0.013*  |
| Preoperative ventilator support, n (%) | 45 (6.7)         | 22 (13.5)        | 23 (4.5)         | 0.000*  |
| Preoperative IABP, n (%)               | 19 (2.8)         | 8 (4.9)          | 11 (2.2)         | 0.066   |
| Cardiogenic shock, n (%)               | 24 (3.6)         | 12 (7.4)         | 12 (2.4)         | 0.003*  |
| Arrhythmia, n (%)                      | 138 (20.6)       | 43 (26.4)        | 95 (18.7)        | 0.035*  |
| <b>Medical history</b>                 |                  |                  |                  |         |
| Family history of CAD, n (%)           | 80 (11.9)        | 18 (11.0)        | 62 (12.2)        | 0.690   |
| Diabetes mellitus, n (%)               | 215 (32)         | 75 (46.0)        | 140 (27.6)       | 0.000*  |
| Dyslipidemia, n (%)                    | 258 (38.5)       | 69 (42.3)        | 189 (37.2)       | 0.242   |
| HTN, n (%)                             | 453 (67.5)       | 136 (83.4)       | 317 (62.4)       | 0.000*  |
| TIA, n (%)                             | 23 (3.4)         | 8 (4.9)          | 15 (3.0)         | 0.233   |
| Cerebrovascular accident, n (%)        | 39 (5.8)         | 15 (9.2)         | 24 (4.7)         | 0.033*  |
| Infective endocarditis, n (%)          | 34 (5.1)         | 11 (6.7)         | 23 (4.5)         | 0.261   |
| COPD, n (%)                            | 73 (10.9)        | 27 (16.6)        | 46 (9.1)         | 0.007*  |
| PAOD, n (%)                            | 17 (2.5)         | 9 (5.5)          | 8 (1.6)          | 0.005*  |

|                                            |                  |                  |                   |        |
|--------------------------------------------|------------------|------------------|-------------------|--------|
| Chronic kidney disease, n (%)              | 207 (30.8)       | 84 (51.5)        | 123 (24.2)        | 0.000* |
| Congestive heart failure, n (%)            | 131 (19.5)       | 53 (32.5)        | 78 (15.4)         | 0.000* |
| Myocardial infarction, n (%)               | 104 (15.5)       | 36 (22.1)        | 68 (13.4)         | 0.008* |
| <b>Baseline laboratory findings</b>        |                  |                  |                   |        |
| Serum creatinine (mg/dL)                   | 0.91 (0.71-1.16) | 1.1 (0.8-1.5)    | 0.9 (0.7-1.1)     | 0.000* |
| eGFR (CKD-EPI: mL/min/1.73m <sup>2</sup> ) | 78.0 (53.2-99.7) | 58.0 (38.2-84.5) | 84.0 (61.6-102.4) | 0.000* |
| Hgb (g/dL)                                 | 13.2 (11.4-14.6) | 12.3 (10.0-14.0) | 13.5 (12.0-14.7)  | 0.000* |
| Preoperative LVEF (%)                      | 62.0 (47.0-69.0) | 33.0 (37.0-66.0) | 63.0 (53.0-70.0)  | 0.000* |
| LVEDD (mm)                                 | 51.6 (46.0-56.0) | 51.6 (48.0-58.0) | 51.6 (46.0-55.0)  | 0.010* |
| Number of Diseased Coronary Vessels, n (%) |                  |                  |                   |        |
| One vessel disease                         | 68 (10.1)        | 17 (10.4)        | 51 (10.0)         | 0.886  |
| Two vessel disease                         | 59 (8.8)         | 18 (11.0)        | 41 (8.1)          | 0.244  |
| Three vessel disease                       | 255 (38.0)       | 73 (44.8)        | 182 (35.8)        | 0.040* |
| CCS Angina Score, n (%)                    |                  |                  |                   |        |
| Score 0                                    | 125 (18.6)       | 46 (28.2)        | 79 (15.6)         | 0.000* |
| Score 1                                    | 134 (20.0)       | 21 (12.9)        | 113 (22.2)        | 0.009* |
| Score 2                                    | 356 (53.1)       | 79 (48.5)        | 277 (54.5)        | 0.177  |
| Score 3                                    | 50 (7.5)         | 15 (9.2)         | 35 (6.9)          | 0.328  |
| Score 4                                    | 6 (0.9)          | 2 (1.2)          | 4 (0.8)           | 0.604  |
| NYHA functional class, n (%)               |                  |                  |                   |        |
| Class I                                    | 113 (16.8)       | 30 (18.4)        | 83 (16.3)         | 0.540  |
| Class II                                   | 365 (54.4)       | 69 (42.3)        | 296 (58.3)        | 0.000* |
| Class III                                  | 161 (24.0)       | 49 (30.1)        | 112 (22.0)        | 0.037* |
| Class IV                                   | 32 (4.8)         | 15 (9.2)         | 17 (3.3)          | 0.002* |
| ASA Physical Status Classification, n (%)  |                  |                  |                   |        |
| Class I                                    | 10 (1.5)         | 2 (1.2)          | 8 (1.6)           | 0.750  |
| Class II                                   | 119 (17.7)       | 20 (12.3)        | 99 (19.5)         | 0.036* |
| Class III                                  | 485 (72.3)       | 115 (70.6)       | 370 (72.8)        | 0.571  |
| Class IV                                   | 51 (7.6)         | 22 (13.5)        | 29 (5.7)          | 0.002* |
| <b>Preoperative medications</b>            |                  |                  |                   |        |
| Beta blockers, n (%)                       | 297 (44.3)       | 64 (39.3)        | 233 (45.9)        | 0.140  |
| ACEi, n (%)                                | 68 (10.1)        | 19 (11.7)        | 49 (9.6)          | 0.459  |
| ARB, n (%)                                 | 138 (20.6)       | 25 (15.3)        | 113 (22.2)        | 0.058  |
| Intravenous nitroglycerin, n (%)           | 20 (3.0)         | 5 (3.1)          | 15 (3.0)          | 0.940  |
| Anticoagulants, n (%)                      | 162 (24.1)       | 48 (29.4)        | 114 (22.4)        | 0.069  |
| Steroids, n (%)                            | 26 (3.9)         | 8 (4.9)          | 18 (3.5)          | 0.432  |
| Aspirin, n (%)                             | 181 (27.0)       | 58 (35.6)        | 123 (24.2)        | 0.004* |
| Lipid-lowering agents, n (%)               | 268 (39.9)       | 68 (41.7)        | 200 (39.4)        | 0.594  |

|                                                |                        |                         |                        |        |
|------------------------------------------------|------------------------|-------------------------|------------------------|--------|
| Dobutamin, n (%)                               | 7 (1.0)                | 1 (0.6)                 | 6 (0.1)                | 0.535  |
| OHA, n (%)                                     | 162 (24.1)             | 54 (33.1)               | 108 (21.3)             | 0.020* |
| Insulin, n (%)                                 | 39 (5.8)               | 20 (12.3)               | 19 (3.7)               | 0.000* |
| <b>Intraoperative variables</b>                |                        |                         |                        |        |
| Operation time (mins)                          | 225.0<br>(190.0-270.0) | 240.0<br>(195.0-300.0)) | 220.0<br>(180.0-260.0) | 0.002* |
| Elective, n (%)                                | 625 (93.1)             | 141 (86.5)              | 484 (95.3)             | 0.000* |
| Robotic technology assisted, n (%)             | 7 (1.0)                | 1 (0.6)                 | 6 (0.1)                | 0.535  |
| Cross clamp time (mins)                        | 44.0 (0.0-70.0)        | 47.0 (0.0-75.0)         | 43.0 (0.0-69.0)        | 0.041* |
| Perfusion time (mins)                          | 95.0 (0.0-132.0)       | 108.0 (77.0-149.0)      | 92.0 (0.0-131.0)       | 0.000* |
| Lowest Core Temperature (°C)                   | 33.0 (32.0-37.0)       | 32.0 (32.0-37.0)        | 34.0 (32.0-37.0)       | 0.041* |
| Cardioversion, n (%)                           | 192 (28.6)             | 63 (38.7)               | 129 (25.4)             | 0.001* |
| Intraoperative IV fluid infusion (mL/kg/hr)    | 11.2 (8.4-15.2)        | 9.8 (7.7-12.8)          | 11.8 (8.7-15.6)        | 0.000* |
| Intraoperative urine output (mL/kg/hr)         | 2.2 (1.2-3.8)          | 1.4 (0.8-2.4)           | 2.2 (1.3-3.7)          | 0.000* |
| Intraoperative estimated blood loss (mL/kg/hr) | 2.5 (1.7-3.6)          | 3.0 (2.2-4.1)           | 2.4 (1.6-3.4)          | 0.000* |
| Cardiopulmonary bypass utilization, n (%)      | 471 (70.2)             | 139 (85.3)              | 332 (65.4)             | 0.000* |
| pRBC transfusion during surgery (units)        | 3.0 (0.0-6.0)          | 6.0 (4.0-10.0)          | 0.0 (0.0-5.0)          | 0.000* |
| FFP transfusion during surgery (units)         | 0.0 (0.0-3.0)          | 0.0 (0.0-4.0)           | 0.0 (0.0-0.0)          | 0.000* |
| PLT transfusion during surgery (units)         | 0.0 (0.0-0.0)          | 0.0 (0.0-12.0)          | 0.0 (0.0-0.0)          | 0.000* |
| <b>Time-series features (ARV)</b>              |                        |                         |                        |        |
| ARV of HR (beats/min)                          | 3.7 (2.7-5.2)          | 4.4 (2.8-5.7)           | 3.6 (2.7-5.1)          | 0.002* |
| ARV of SBP (mmHg)                              | 7.3 (5.9-8.7)          | 7.4 (5.7-8.8)           | 7.3 (5.9-8.7)          | 0.648  |
| ARV of DBP (mmHg)                              | 4.7 (3.7-6.1)          | 4.8 (3.6-6.1)           | 4.7 (3.7-6.1)          | 0.947  |
| ARV of MAP (mmHg)                              | 5.5 (4.3-6.7)          | 5.3 (4.2-6.7)           | 5.5 (4.3-6.7)          | 0.638  |

Data are presented as median (interquartile range) or number (%). \* means p-value < 0.05 when comparing patients with and without acute kidney injury following cardiac surgery. Abbreviations: AKI, acute kidney injury; BMI, body mass index; CABG, coronary artery bypass grafting; ER, emergency room; CAD, coronary artery disease; HTN, hypertension; TIA, transient ischemic stroke; COPD, chronic obstructive pulmonary disease; PAOD, peripheral artery occlusive disease; eGFR, estimated glomerular filtration rate; CKD-EPI, Chronic Kidney Disease Epidemiology Collaboration, LVEF = left ventricular ejection fraction; LVEDD, left ventricular end-diastolic diameter; CCS, Canadian Cardiovascular Society; NYHA, New York Heart Association; ASA, American Society of Anesthesiologists; ACEi, angiotensin-converting-enzyme inhibitor; ARB, angiotensin II receptor blocker; OHA, oral hypoglycemic agents; IV, intravenous; pRBC, packed red blood cell; FFP, fresh frozen plasma; PLT, platelet; ARV, average real variability; HR, heart rate; SBP, systolic blood pressure, DBP, diastolic blood pressure; MAP, mean arterial pressure.
